# Supplementary material
Source: PubMed Central journal article supplement (PMC8552416)

Tangle x 100

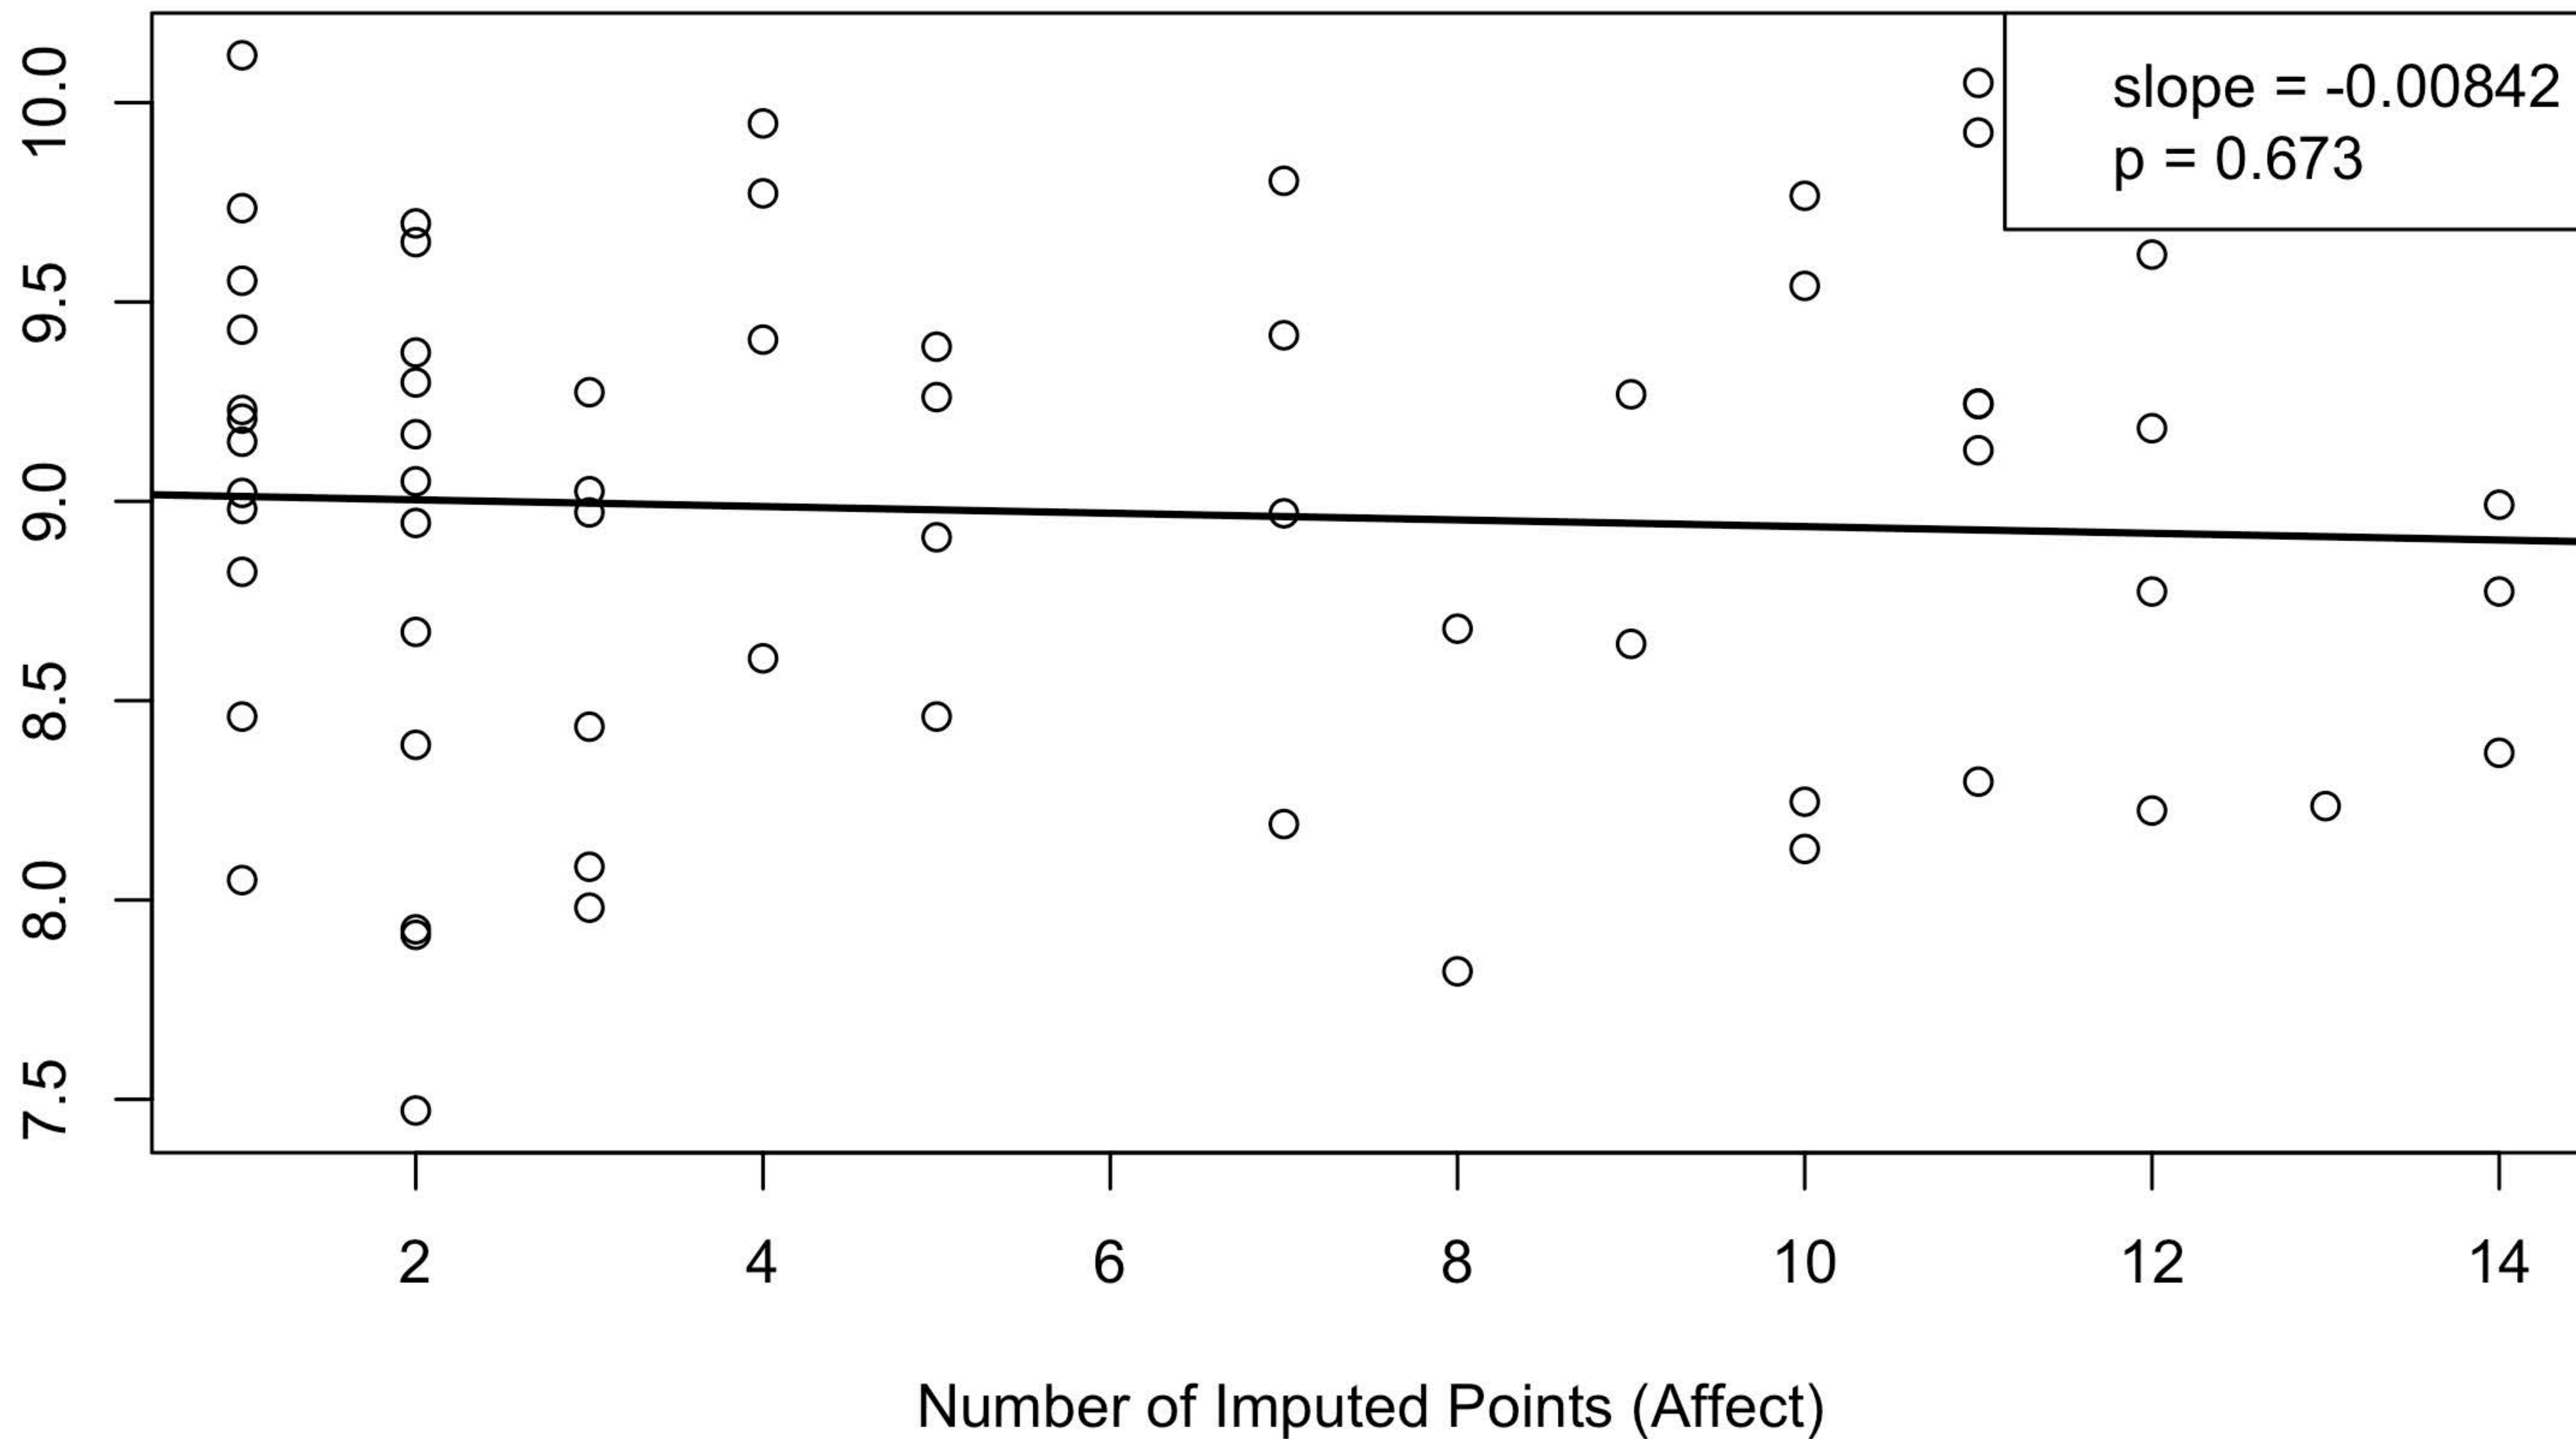

Supplement: NIHMS1727670-supplement-Supplemental_Material_1.pdf [file NIHMS1727670-supplement-Supplemental_Material_1.pdf]

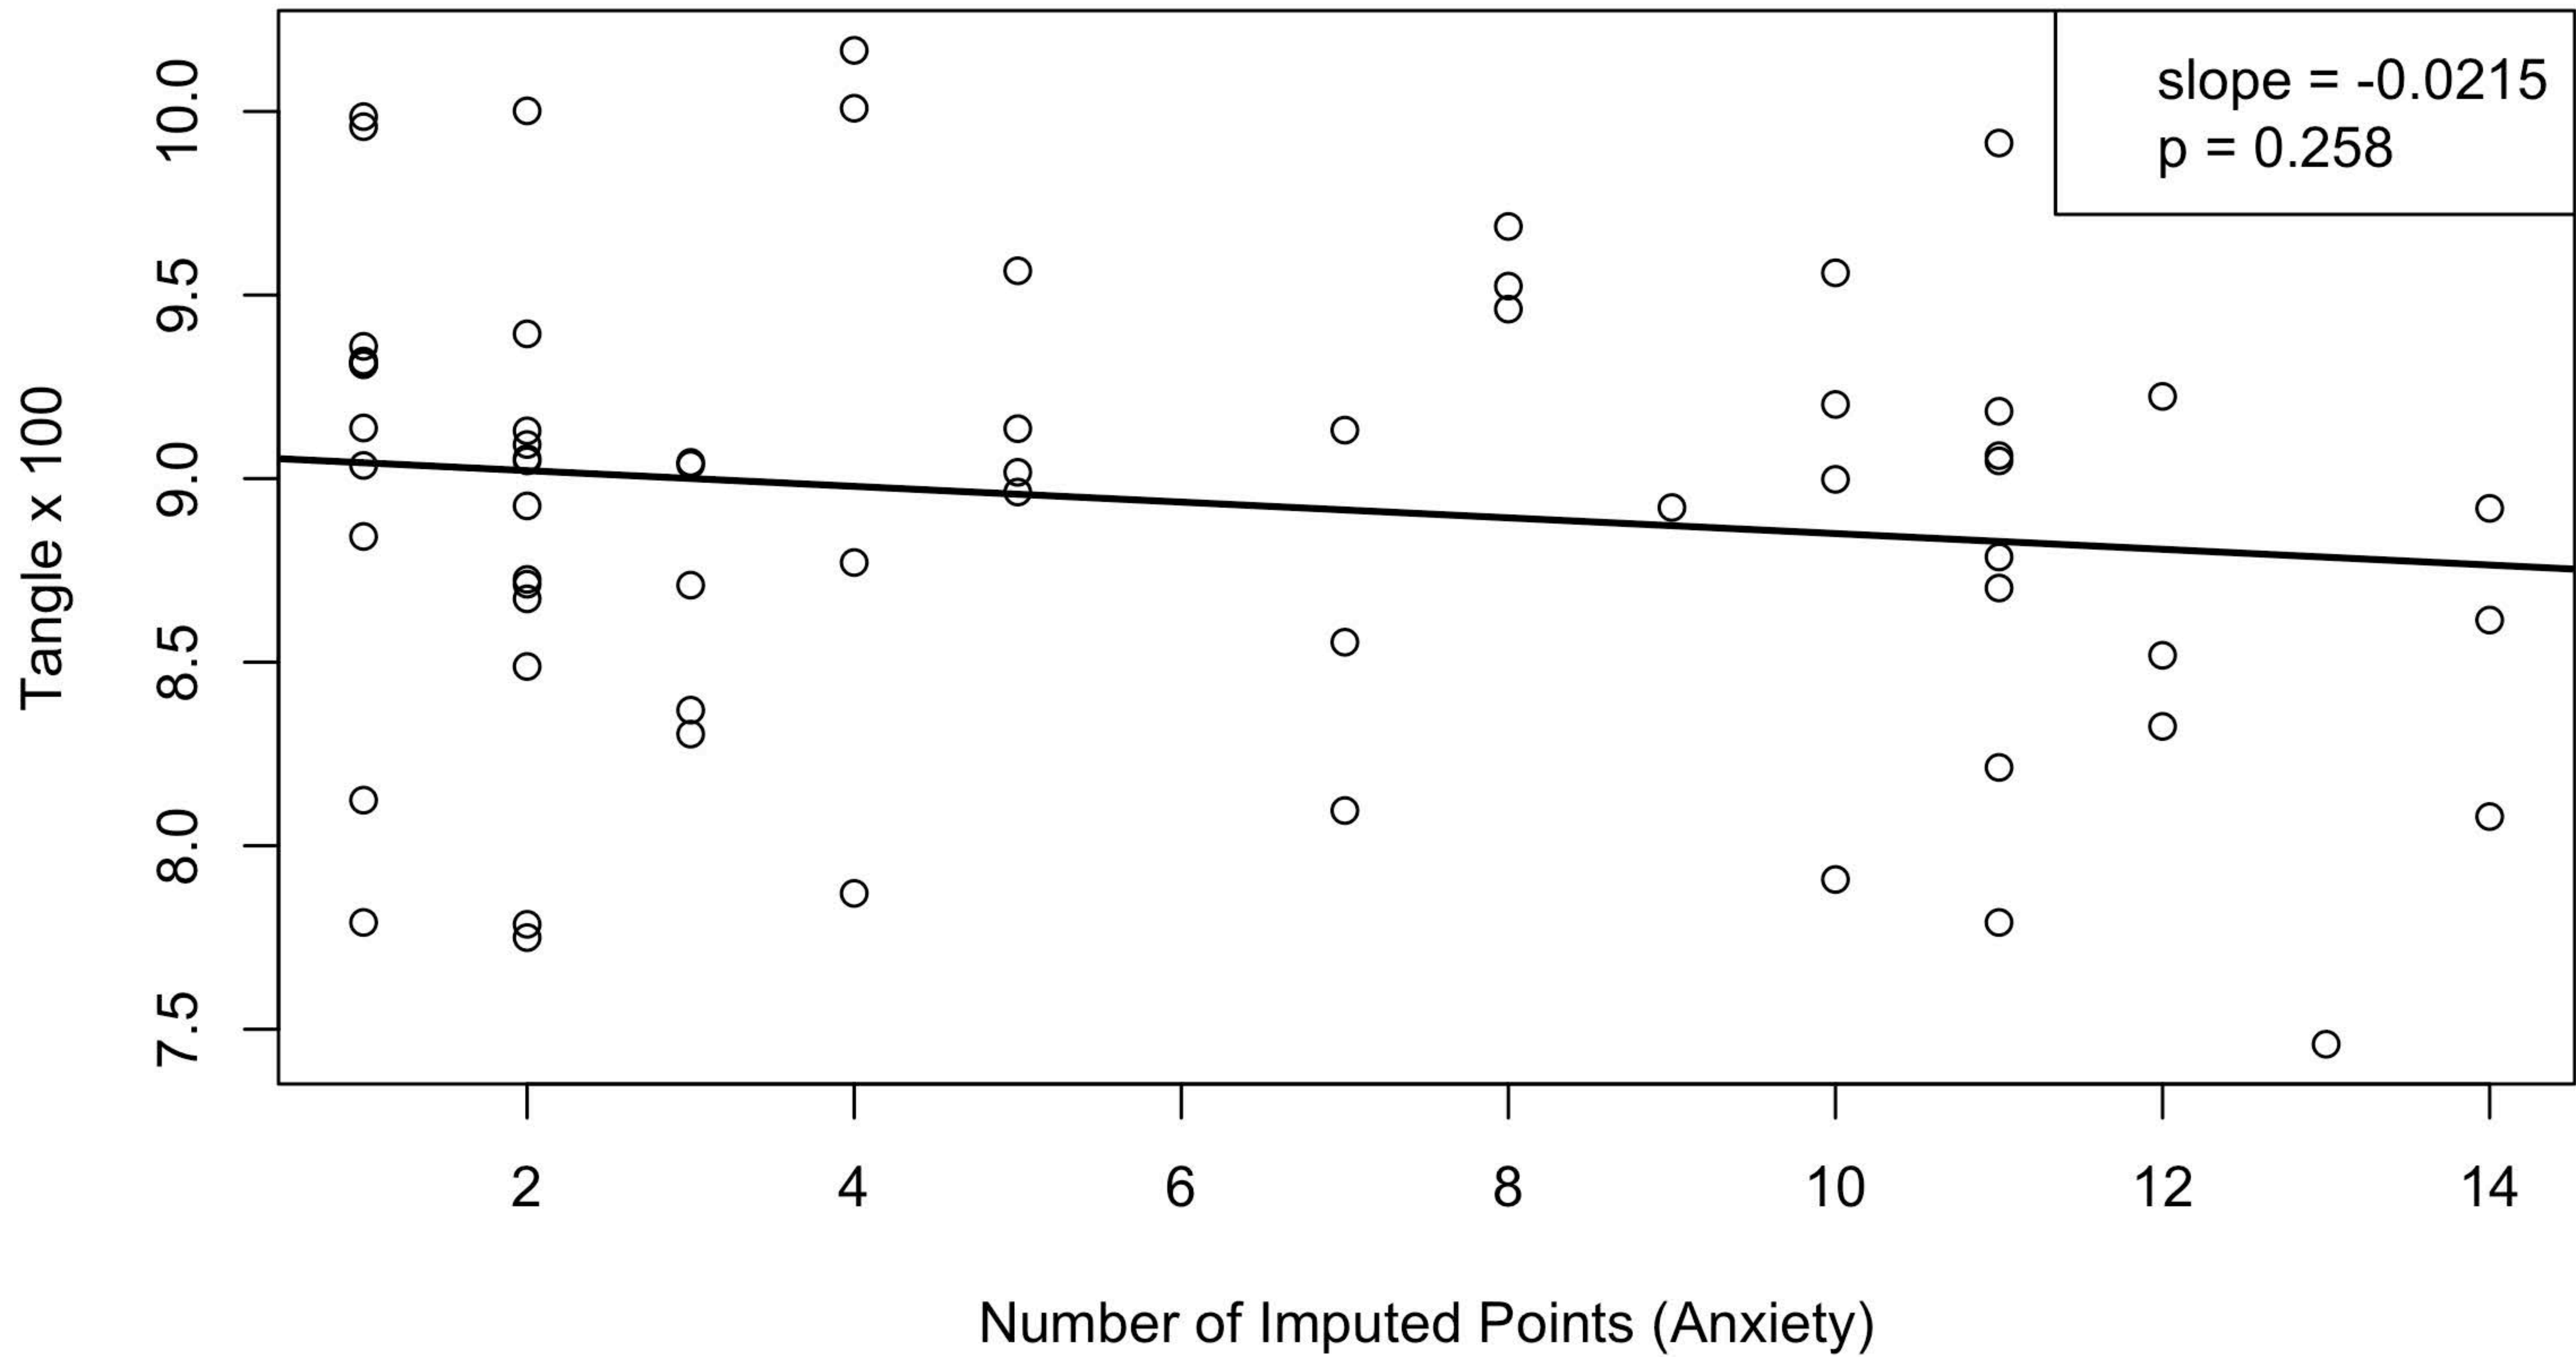

Supplement: NIHMS1727670-supplement-Supplemental_Material_2.pdf [file NIHMS1727670-supplement-Supplemental_Material_2.pdf]

Tangle x 100

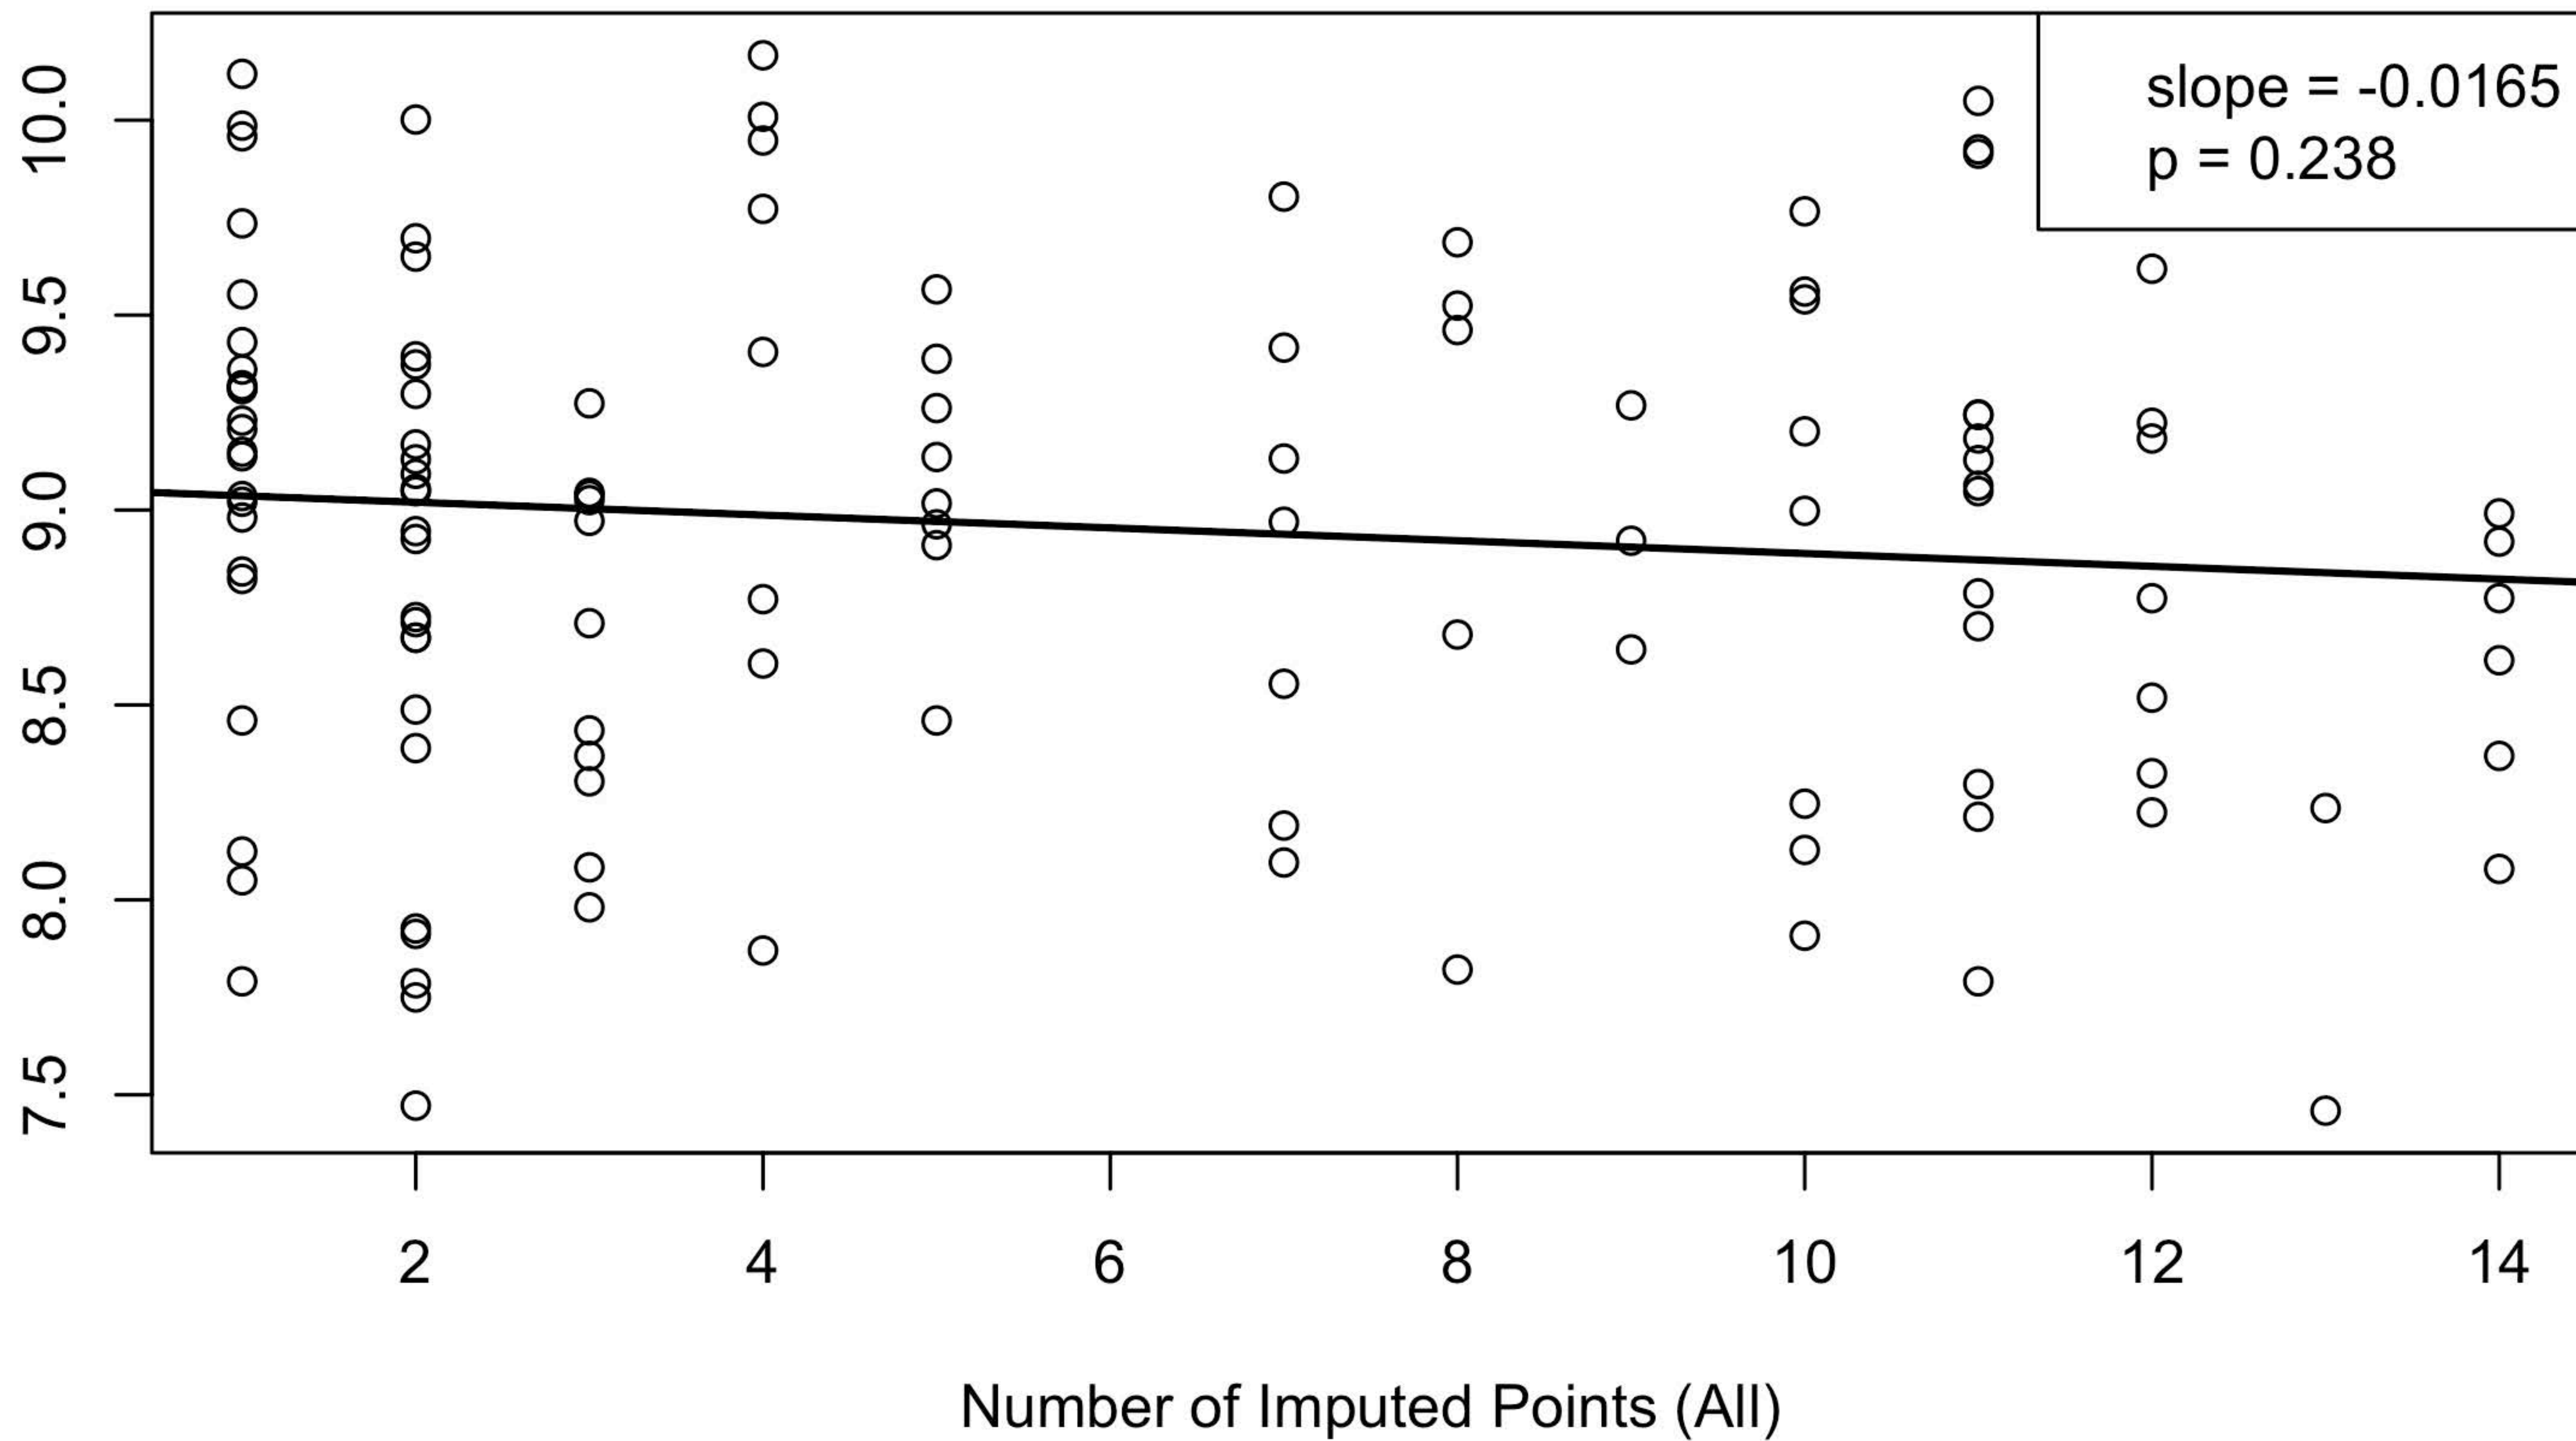

Supplement: NIHMS1727670-supplement-Supplemental_Material_3.pdf [file NIHMS1727670-supplement-Supplemental_Material_3.pdf]
